# Supplementary material for: A Cytoplasmic Complex Mediates Specific mRNA Recognition and Localization in Yeast
Source: PLOS journal article supplement (doi:10.1371/journal.pbio.1000611), 2011-04-19

Figure S7

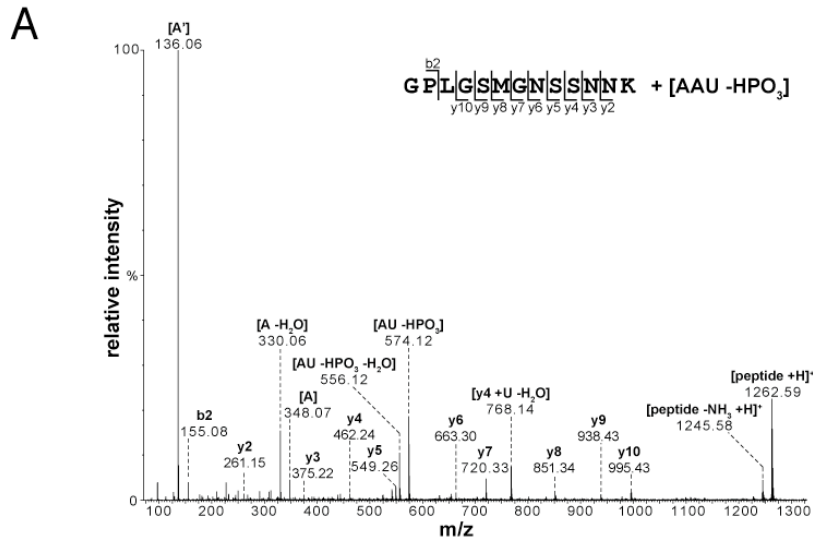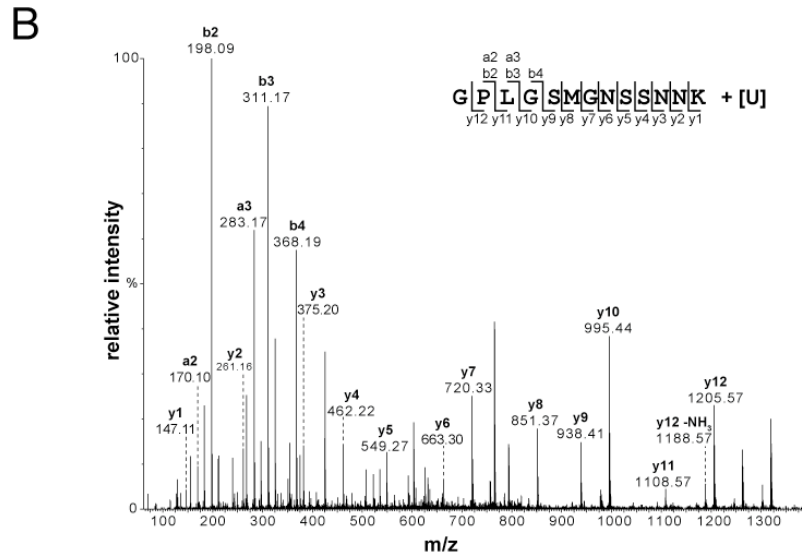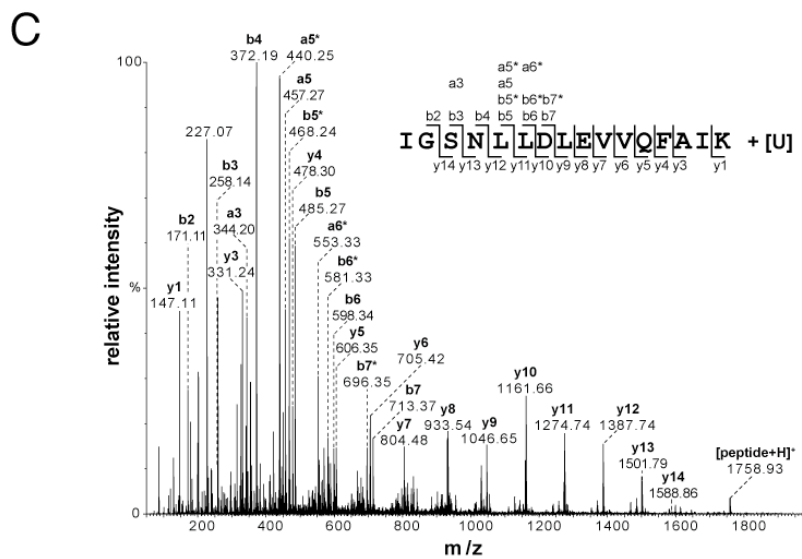

Supplement: S7 (10.1371/journal.pbio.1000611.s007) [file journal.pbio.1000611.s007]
